# Supplementary material for: Placenta Accreta Spectrum Part I: anesthesia considerations based on an extended review of the literature
Source: publisher site journal article supplement (doi:10.1515/jpm-2022-0232), 2022-10-01
Supplement: Supplementary file 1 [file j_jpm-2022-0232_suppl_001.docx]

| **Placenta Accreta Spectrum part I: anesthesia considerations based on an extended review of the literature. - Supplemental Table 1: Main characteristics of studies included for analysis** | | | | | | | | | | | | | | | | | | | | | | | | | | | | | | | | | | | | | | | | | | | | | | | | | |
| --- | --- | --- | --- | --- | --- | --- | --- | --- | --- | --- | --- | --- | --- | --- | --- | --- | --- | --- | --- | --- | --- | --- | --- | --- | --- | --- | --- | --- | --- | --- | --- | --- | --- | --- | --- | --- | --- | --- | --- | --- | --- | --- | --- | --- | --- | --- | --- | --- | --- |
|  |  | **Way of anesthesia**  prepartum | | | | postpartum | | | | **PAS Type** | | | **Monitoring** | | **Medication** | | | | **Post-operative care** | | | | **Cell salvage** | | **Tranexamic acid (TXA) and hemostatic agents requirement** | | | | | | | **Blood loss and transfusion** | | | | | | **Blood works** | | | | | | | | | **Surgical procedures and therapeutic options** | | |
| **1st Author** | **Study-design**  **(n=xx)** | GA | SpA | EDA | EDA/Spa + GA | GA | SpA | EDA | ECA/Spa + GA | Accreta | Increta | Percreta | Arterial line | Shaldon/CVL | Induction | Relaxant | Local anesthetics | Uterotonics | ICU | PACU | Ward | Death | Collection [mL] | Re-transfusion [mL] | TXA prophylaxis | TXA therapy | Fibrinogen [g] | PCC [IU] | rVIIa [mg] | XIII [IU] | Cryoprecipitate [U] | Estimated blood loss (EBL) [mL] | RBC [U] | FFP [U] | Platelets [U] | Crystalloids [mL] | Colloids [mL] | Hemoglobin [mL] | Hematocrit [%] | Platelets [/𝜇L] | Quick [%] | PTT [s] | Fibrinogen [mg/dL] | AT-III [%] | D-dimer [mg/L] | DIC | Conservative | Partial resection | Hysterectomy |
| Sentilhes L  [1] | multi-center  n=167 |  |  |  |  |  |  |  |  | x |  | x |  |  |  |  |  | 167 | 43 |  |  | 1 |  |  |  |  |  |  |  |  |  |  | n=70a  (>5U: n=25) |  |  |  |  |  |  |  |  |  |  |  |  |  | 131 |  | 36 |
| Frasca D  [2] | case report | x |  |  |  |  |  |  |  | x |  | x | x | x | Eto | Succ |  |  | x |  |  |  |  |  |  |  |  |  | 90 µg/kg |  | 10 | 16000 | 22 | 8 | 12 | 12000 |  | 11.5 -> 5.4 -> 11.2b | pre: 35,7 | pre: 221 |  | 20.8 | 157 |  | 0.984 | x |  |  | x |
| Kamani AA  [3] | case report |  |  | x |  | x |  |  |  | x |  |  | x | x | Ket | Succ, Panc |  |  | x |  |  |  |  |  |  |  |  |  |  |  | 15 | 15000 |  | 12 | 12 | 13000 |  | 11.4 -> 12.4c |  | 71 |  | norm |  |  |  |  |  |  | x |
| Matsu-zaki S  [4] | case report |  | CSE |  |  |  |  |  |  |  |  | x |  |  |  |  |  |  |  |  |  |  |  |  |  |  |  |  |  |  |  | 200 |  |  |  |  |  | 11 (day47) |  | 145 (day47) |  | 37 | 42 (day47) |  | 40.35 | x | x |  |  |
| Bourre-lier L  [5] | case series  n=2 |  |  |  |  |  |  |  |  | x |  |  |  |  |  |  |  | x |  |  |  |  |  |  |  |  |  |  |  |  |  |  |  |  |  |  |  | 9.6 (day58) |  | 100 (day58) |  |  |  |  | >10 |  | x |  |  |
|  |  |  |  |  |  |  |  | x |  |  |  |  |  |  |  | x |  |  |  |  |  |  |  |  |  |  |  |  |  |  | 6 | 6 |  |  |  | 10.1 (day60) |  | 119 (day60) |  |  |  |  |  | x |  |  | x |
| Desbriere R  [6] | case report |  |  |  |  |  |  |  |  |  |  |  |  |  |  |  |  |  |  |  |  |  | 2300 |  |  |  |  |  |  |  |  | 5000 | 8 | 14 | 2 |  |  | 9 (day72) |  | 106 (day72) | 20.20s (day72) | 50.5 (day72) | 60 (day72) |  |  | x | x |  | sec. |
| Weiniger CF  [7] | retrosp.  n=28 | x | 4 CSE |  |  |  |  |  |  | x |  | x | x |  | Prop, Thio, Ket | Succ |  |  | x |  |  |  |  |  |  |  |  |  |  |  | 11 |  | 8 | 5 | 6 | 2600-5100 | 100-200 |  |  |  |  |  |  |  |  |  |  |  | 12 |
| Schröder L  [8] | case report |  |  |  |  |  |  |  |  |  |  | x |  |  |  |  |  |  |  |  |  |  |  |  |  | x |  |  |  |  |  |  |  |  |  |  |  |  |  | 249 (day71) |  | 47.5 (day71) | 64 (day71) | 100 (day71) | 36 (day71) |  |  |  |  |
| Kume K  [9] | case report | x |  |  |  | x |  |  |  |  |  | x |  |  | Prop, Remi | Roc |  |  | x |  |  |  | x |  |  |  |  |  |  |  |  | 47000 | 120 | 90 | 100 |  |  | 12.7 (day3) |  | 112 (day3) |  | 27.4 (day3) | 501 (day3) |  |  |  |  |  | x |
| Bergak-ker S  [10] | case report |  | x |  |  |  |  |  |  |  |  |  |  |  | Fent, MO |  | hbBup | Oxy |  | x |  |  |  |  |  |  |  |  |  |  |  | 2500 |  |  |  | 4600 |  | 12.7 -> 8.9 -> 9.1b | pre: 37.4 | pre: 223 |  |  | post: 338 |  |  |  |  | x |  |
| Taylor NJ  [11] | retrosp.  n=40 |  | 38 CSE |  | 9 | 17 |  |  |  | 31 | 2 | 7 | 29 | 18 | Fent, Thio, Iso, NO2 | Succ | hbBup |  | 4 |  |  |  | n=26a (1990) | 346 |  | n=8a |  |  |  |  | n=4a | 1700 | n=14a | n=13a | 6 |  |  | 11.7 -> 10.6c |  |  |  |  |  |  |  |  |  |  | 24 |
| Sivasan-kar C  [12] | case report |  | x |  |  | x |  |  |  |  |  | x | x |  |  |  |  |  | x |  |  |  |  |  |  |  |  |  |  |  |  | 4000 |  |  |  |  |  |  |  |  |  |  |  |  |  |  |  |  | x |
| Khokhar RS  [13] | case report | x |  |  |  | x |  |  |  | x |  |  | x | x | Prop | Succ, Cis |  | Oxy  Carb |  |  | x |  |  |  |  |  |  |  |  |  |  | 1000 | 3 |  |  | 2500 |  | pre: 9 |  |  |  |  |  |  |  |  |  |  | x |
| Yamada T  [14] | case series  n=3 |  |  |  | CSE | x |  |  |  |  |  | x | x | x | Des, Fent |  |  |  |  |  |  |  |  | 400 |  |  |  |  |  |  |  | 1850[g] |  |  |  |  |  |  |  |  |  |  |  |  |  |  | x |  |  |
|  |  |  | CSE | x |  |  |  | x |  |  | x |  | Sevo, Remi |  |  |  |  |  |  |  |  |  |  |  |  |  |  |  |  | 1180  [g] | 2 | 1 |  |  |  |  |  |  |  |  |  |  |  |  | x |  | x |
|  |  |  | CSE | x |  |  |  |  |  | x | x |  | Des, Fent |  |  |  |  |  |  |  |  |  |  |  |  |  |  |  |  |  |  |  |  |  |  |  |  |  |  |  |  |  |  |  | x |  | x |
| Fratto VM  [15] | retrosp.  n=123 | 36 |  |  |  |  |  |  |  | 42 | 43 | 38 |  |  |  |  |  |  |  |  |  |  | n=24a |  |  |  |  |  |  |  |  | 2000/  3450 |  |  |  |  |  |  |  |  |  |  |  |  |  |  |  |  |  |
| Binici O  [16] | retrosp.  n=92 | 26 | 23 |  |  |  |  |  |  |  | 49 |  |  |  |  |  |  |  | 3 |  | 46 | 0 |  |  |  |  |  |  |  |  |  | 400 | n=18a | n=6a |  | n=49a | n=10a |  |  |  |  |  |  |  |  |  |  |  |  |
| 1 |  |  |  |  |  |  |  | 1 |  |  |  |  |  |  |  |  | 1 |  |  |  |  |  |  |  |  |  |  |  |  | 500 | n=0a | n=0a |  | n=1a | n=0a |  |  |  |  |  |  |  |  |  |  |  |  |
| 32 | 8 |  |  |  |  |  | 2 |  |  | 42 |  |  |  |  |  |  | 15 |  | 27 | 0 |  |  |  |  |  |  |  |  |  | 875 | n=27a | n=17a |  | n=42a | n=22a |  |  |  |  |  |  |  |  |  |  |  |  |
| Shamshi-rsaz AA  [17] | retrosp.  n=123 | 37 |  |  |  |  |  |  |  | 9 | 31 | 28 |  |  |  |  |  |  |  |  |  |  |  |  |  |  |  |  |  |  |  | 2100 | 3 | 2 | 0 | 4000 |  |  |  |  |  |  |  |  |  | 22 |  |  |  |
| 86 |  |  |  |  |  |  |  | 20 | 72 | 66 |  |  |  |  |  |  |  |  |  |  |  |  |  |  |  |  |  |  |  | 1400 | 1 | 0 | 0 | 3500 |  |  |  |  |  |  |  |  |  | 0 |  |  |  |
| Karacaer F  [18] | retrosp.  n=89 | 84 | 2 (1 CSE) |  | 2 |  |  |  |  | 85 |  | 4 | 89 |  | Prop, Thio, Fent | Succ, Roc | Bup |  |  |  |  |  |  |  |  |  |  |  |  |  |  |  | 4 | 4 | 2 | 2848 | 1289 | pre: 10.98 | pre: 33.21 |  |  |  |  |  |  |  |  |  | 57 |
| Quist-Nelson J  [19] | retrosp.  n=39 | 9 | 6 | 7 | 3 CSE |  |  |  |  | 11 | 2 | 2 |  |  |  |  |  |  | 5 |  |  |  | n=1a |  |  |  |  |  |  |  |  | 2700 | 3 | 0 | 0 | 5150 |  |  |  |  |  |  |  |  |  |  |  |  |  |
| 10 | 1 | 15 | 1 CSE |  |  |  |  | 10 | 6 | 5 |  |  |  |  |  |  | 4 |  |  |  | n=16a |  |  |  |  |  |  |  |  | 1200 | 1 | 0 | 0 | 4000 |  |  |  |  |  |  |  |  |  |  |  |  |  |
| Atallah D  [20] | case report |  |  |  |  |  |  |  |  |  |  | 1 |  |  |  |  |  |  | 1 |  |  |  |  |  |  |  |  |  |  |  |  | 1800 | 7 | 6 | 1 |  |  | post: 10.8  day2: 8.7 | post: 32  day2: 26 |  |  |  |  |  |  |  |  |  | 1 |
| Biele C  [21] | case report |  |  | x |  | x |  |  |  |  |  | 1 | 1 |  |  |  |  |  | 1 |  |  |  |  |  | 1 | 1 | 4g | 1800 IU |  |  |  | prim.: 500  sec.: 3500 | 2 | 3 | 0 |  |  | 13.6 (day54) |  |  | 41 (day54) |  | 59 (day54) |  | >20 (day54) | x | prim. | sec. |  |
| Ma Y  [22] | case report |  | x | x |  |  |  |  |  | x |  |  | ? |  |  |  | Bup | Nitro |  |  |  |  |  | 421 |  |  |  |  |  |  |  | 1400 | 0 | 0 | 0 | 3000 | 500 |  |  |  |  |  |  |  |  |  |  | x |  |
| Ito M  [23] | case report | x |  |  |  |  |  |  |  | x | x |  | x |  | Prop, Remi | Roc |  |  |  |  |  |  |  |  |  |  |  |  |  |  |  | 3000/  5860 | 10 | 6 | 10 |  |  |  |  |  |  |  |  |  |  |  |  |  | x |
| Cojocaru L  [24] | retrosp.  LCVSS n=44 | 26 | 18 |  |  | 0 |  |  |  | 34 |  | 10 |  |  |  |  |  |  | 1 |  |  |  |  |  |  |  |  |  |  |  |  | 1124  (300-4100) | 0 (0-11) | 0 (0-7) | 0 (0-1) |  |  |  |  |  |  |  |  |  |  |  |  |  | 44 |
| retrosp.  control n=25 | 19 | 4 |  |  | 2 |  |  |  | 22 |  | 3 |  |  |  |  |  |  | 3 |  |  |  |  |  |  |  |  |  |  |  |  | 3500  (650-10600) | 6 (0-23) | 0 (0-14) | 0 (0-3) |  |  |  |  |  |  |  |  |  |  |  |  |  | 25 |
| Urfahog-lu A  [25] | retrosp.  n=28 | 27 | 1 |  |  |  |  |  |  |  |  |  | 25 | 21 |  |  |  |  | 11 |  |  |  |  |  |  |  |  |  |  |  |  | 1582.14 ±790.71 | 1189.35 ±884.7mL | 300 ±280mL |  | 1628.57 ±728.19 | 267.85 ±38.62 | pre: 11.56 ±1.28  post: 10.31 ±1.32 |  |  |  |  |  |  |  |  |  |  |  |
| Nieto AJ  [26] | retrosp.  n=62 | 30 | 22 (18 CSE) | 2 | 3 | 5 |  |  |  | 31 | 8 | 9 | ? | 37 |  |  |  |  | 2 (1-3) |  |  | 3 | n=18a | 205 |  | 19 |  |  |  |  | 5 | 2000  (1500-3025) | n = 34a  1.5 (0-4) | n=9a | n=6a | 3300  in 24h post-OP  no differentiation between Cryst./Coll. | | pre: 11.8 (10.9-12.7)  post: 9.9 (8.9-11.8) |  |  |  | pre: 30 ( 27.3-32.8)  post: 32 (29.5-33.5) | pre: 453.5 (349-507.2)  post: 344.5 (287.5-425) |  |  |  |  | 8 | 44 |
| Zhu H  [27] | prosp. observ.  PAABO n=25 | 24 |  | 1 CSE |  |  |  |  |  | 12 |  | 6 | 25 | 25 | Prop, Remi | Succ, Cis |  | Oxy, Carb, Trom |  |  |  |  |  |  |  |  |  |  |  |  |  | 1276  ±945.7 | 676  ±931  mL |  |  |  |  |  |  |  |  |  |  |  |  |  |  |  | 2 |
| prosp. observ.  control n=23 | 3 |  | 20 CSE |  |  |  |  |  | 8 |  | 4 | 25 | 25 |  |  |  |  |  |  |  |  |  |  |  |  |  |  |  |  |  | 1900  ±1157.2 | 713± 1008 mL |  |  |  |  |  |  |  |  |  |  |  |  |  |  |  | 4 |
| Schwick-ert A  [28] | multi-center retro- & prosp.  n=338 |  |  |  |  |  |  |  |  | 79 | 62 | 197 |  |  |  |  |  | Oxy, Prost, none |  |  |  |  |  |  | 52 | 97 |  |  |  |  |  | 2000  (1000-3500) | 2  (0-108) |  |  |  |  |  |  |  |  |  |  |  |  |  | 24  +15 delayed | 26 | 222 +15 delayed  +51 manual remov. |
| Bartels HC  [29] | retrosp.  MDT n=28 |  |  |  |  |  |  |  |  |  |  |  |  |  |  |  |  |  |  |  |  |  |  |  |  |  |  |  |  |  |  | 4150  (800-19500) | 7  (0-30) |  |  |  |  |  |  |  |  |  |  |  |  |  |  |  | 28 (87.5%) |
| retrosp.  control n=32 |  |  |  |  |  |  |  |  |  |  |  |  |  |  |  |  |  |  |  |  |  |  |  |  |  |  |  |  |  |  | 1975  (495-8500) | 1  (0-13) |  |  |  |  |  |  |  |  |  |  |  |  |  |  |  | 19 (67.9%) |
| Khoiwal K  [30] | prosp. case series  n=7 | 7 |  |  |  |  |  |  |  | 6 |  |  |  |  |  |  |  | none | - |  |  | 0 |  |  |  |  |  |  |  |  |  | 200-3000 | 0-6 | 0-4 | 0-4 |  |  |  |  |  |  |  |  |  |  |  | 1 |  | 6 |
| Saito K  [31] | case report |  |  | CSE |  |  |  |  |  |  |  | 1 |  |  |  |  |  |  |  |  |  |  |  |  |  |  |  |  |  |  |  | 2600 | 8 | 4 |  |  |  |  |  |  |  |  |  |  |  |  |  |  | 1 |
| Frank Wolf M  [32] | two-center retrosp.  group A n=83 |  |  |  |  |  |  |  |  |  |  | 43.4% |  |  |  |  |  |  |  |  |  |  |  |  |  |  |  |  |  |  |  | 886 ±1457 | ? |  |  |  |  | ? |  |  |  |  |  |  |  |  |  |  | 36.10% |
| two-center retrosp.  group B n=65 | 65 |  |  |  |  |  |  |  |  |  | 16.9% |  |  |  |  |  |  |  |  |  |  |  |  |  |  |  |  |  |  |  | 1190 ±1629 | ? |  |  |  |  | ? |  |  |  |  |  |  |  |  |  |  | 29.20% |
| Kim MJ  [33] | retrosp.  n=117 |  |  |  |  |  |  |  |  | 18 PAS | | |  |  |  |  |  |  |  |  |  |  |  |  |  |  |  |  |  |  |  |  | 7.18 ±2.66 | 4.23 ±4.96 | 4.5 ±6.5 |  |  | Hb/Hct nadir: 8.3±2  1. POD: 10.07 ± 1.7 |  |  |  |  |  |  |  | 14 |  |  |  |
| Tokue H  [34] | retrosp.  IAABO n=28 |  |  |  |  |  |  |  |  | 24 | 2 | 2 |  |  |  |  |  |  |  |  |  |  |  |  |  |  |  |  |  |  |  | 3997 ±2029.6 | 14 ±7,5 |  |  |  |  |  |  |  |  |  |  |  |  |  |  |  | 18 |
| retrosp.  IIABO n=32 |  |  |  |  |  |  |  |  | 24 | 5 | 3 |  |  |  |  |  |  |  |  |  |  |  |  |  |  |  |  |  |  |  | 4272.9 ±4230-8 | 12.6 ±9.2 |  |  |  |  |  |  |  |  |  |  |  |  |  |  |  | 15 |
| Papillon-Smith J  [35] | retrosp.  ligation n=32 | 11 | 21 |  |  |  |  |  |  | 3 | 6 | 23 |  |  |  |  |  |  |  |  |  |  | n= 25a | 165 ±36 |  |  |  |  |  |  |  | 1874 ±245 | 0  (0-9) |  |  |  |  | pre: 11.2±0.2  post: 9.9±0.3 |  |  |  |  |  |  |  |  |  |  |  |
| retrosp.  BO n=47 | 16 | 31 |  |  |  |  |  |  | 0 | 10 | 37 |  |  |  |  |  |  |  |  |  |  | n= 28a | 321 ±107 |  |  |  |  |  |  |  | 1713 ±181 | 0  (0-12) |  |  |  |  | pre: 11.0±0.2  post: 10.1±0.2 |  |  |  |  |  |  |  |  |  |  |  |
| Li P  [36] | retrosp.  low-suspicion n=10 |  |  |  |  |  |  |  |  | 1 | 1 | 0 |  |  |  |  |  |  | 1 |  |  |  |  |  |  |  |  |  |  |  |  | 500  (200-800) | 0  (0-2) |  |  |  |  | 1.POD:  10.6±1.27 |  | 166  (95-333) | 0.92  (0.81-1.12) | PT 10.8  (10.5-13.5) |  |  |  |  |  |  | 0 |
| retrosp.  high-suspicion n=47 |  |  |  |  |  |  |  |  | 14 | 10 | 6 |  |  |  |  |  |  | 6 |  |  |  |  |  |  |  |  |  |  |  |  | 500  (200-3500) | 0  (0-14) |  |  |  |  | 1.POD:  9.8±1.51 |  | 171  (71-328) | 0.93  (0.79-1.28) | PT 10.5  (9.2-12.4) |  |  |  |  |  |  | 4 |
| Chen M  [37] | singe center RCT  IIA n=50 | 50 |  |  |  |  |  |  |  | 21 |  | 17 |  |  |  |  |  |  | 9 |  |  |  |  |  |  |  | n=10a |  |  |  | n=7a | 2630  ±1585 | 5.3 ±5.3 | 349 mL ±433 | 0 |  |  | pre: 10.9±1.4 |  |  |  |  |  |  |  |  |  |  | 22 |
| singe center RCT  control n=50 | 50 |  |  |  |  |  |  |  | 18 |  | 14 |  |  |  |  |  |  | 13 |  |  |  |  |  |  |  | n=9a |  |  |  | n=6a | 2221  ±1694 | 4.7 ±5.4 | 302 mL ±469 | 0 |  |  | pre: 11.3±1.2 |  |  |  |  |  |  |  |  |  |  | 16 |
| Dai M  [38] | prosp.  non-BC n=27 | ? |  |  |  |  |  |  |  | 7 | 10 | 5 |  |  |  |  |  |  | ? |  |  |  |  |  |  |  |  |  |  |  |  | 3717  ±2717 | 11.48 ±8.72 |  |  |  |  |  |  |  |  |  |  |  |  | 4 |  |  | 6 |
| prosp.  BC n=22 | 22 |  |  |  |  |  |  |  | 5 | 8 | 7 |  |  |  |  |  |  | 22 |  |  |  |  |  |  |  |  |  |  |  |  | 2695  ±2334 | 7.77 ±7.09 |  |  |  |  |  |  |  |  |  |  |  |  | 0 |  |  | 1 |
| prosp.  PBC n=51 | 51 |  |  |  |  |  |  |  | 12 | 19 | 13 |  |  |  |  |  |  | 51 |  |  |  |  |  |  |  |  |  |  |  |  | 1846  ±2187 | 5.65 ±5.71 |  |  |  |  |  |  |  |  |  |  |  |  | 3 |  |  | 3 |
| Yuan Q  [39] | retrosp.  UAE n=28 |  |  | ? |  |  |  |  |  | 16 | 10 | 2 |  |  |  |  |  |  | 28 |  |  |  |  |  |  |  |  |  |  |  |  | 1325  ±871.4 | 2.8 ±3.8 | 100 mL  ±185.2 |  |  |  |  |  |  |  |  |  |  |  | 3 |  |  | 8 |
| retrosp.  control n=26 |  |  | 26 |  |  |  |  |  | 18 | 7 | 1 |  |  |  |  |  |  | 26 |  |  |  |  |  |  |  |  |  |  |  |  | 4483.3  ±2294.7 | 10.8 ±6.2 | 666.7 mL  ±273.2 |  |  |  |  |  |  |  |  |  |  |  | 9 |  |  | 11 |
| Imtiaz R  [40] | retrosp.  n=96 |  |  |  |  |  |  |  |  |  |  |  |  |  |  |  |  |  | 30 |  |  | 23 |  |  |  |  |  |  |  |  |  |  | 6  (2-12) |  |  |  |  |  |  |  |  |  |  |  |  |  |  |  | 42 |
| Peng W  [41] | retrosp.  IIA  n=252 | 252 |  |  |  |  |  |  |  | 0 | 192 | 60 |  |  |  |  |  |  |  |  |  |  |  |  |  |  |  |  |  |  |  | 1967.66  ±1466.64 | 6.54  ±5.67 |  |  |  |  |  |  |  |  |  |  |  |  |  |  |  |  |
| retrosp.  CIA  n=38 | 38 |  |  |  |  |  |  |  | 0 | 29 | 9 |  |  |  |  |  |  |  |  |  |  |  |  |  |  |  |  |  |  |  | 2207.89  ±2044.95 | 7.42  ±7.872 |  |  |  |  |  |  |  |  |  |  |  |  |  |  |  |  |
| retrosp.  control  n=296 | ? |  |  |  |  |  |  |  | 189 | 99 | 8 |  |  |  |  |  |  |  |  |  |  |  |  |  |  |  |  |  |  |  | 1338.18  ±1286.14 | 3.99  ±5.29 |  |  |  |  |  |  |  |  |  |  |  |  |  |  |  |  |
| Zhou X  [42] | retrosp.  IIABO n=58 |  |  |  |  |  |  |  |  |  |  |  |  |  |  |  |  |  |  |  |  |  |  |  |  |  |  |  |  |  |  | 1215.52  ±762.57 | 425.86 mL  ±667.43 |  |  |  |  |  |  |  |  |  |  |  |  | 3 |  |  | 4 |
| retrosp.  control n=25 |  |  |  |  |  |  |  |  |  |  |  |  |  |  |  |  |  |  |  |  |  |  |  |  |  |  |  |  |  |  | 1602  ±862.47 | 832.8 mL  ±887.89 |  |  |  |  |  |  |  |  |  |  |  |  | 3 |  |  | 3 |
| Titapant V  [43] | retrosp.  n=113 |  |  |  |  |  |  |  |  |  |  |  |  |  |  |  |  |  |  |  |  |  |  |  |  |  |  |  |  |  |  | 800  (20-13000) | 1929 mL  (297-11038) |  |  |  |  |  |  |  |  |  |  |  |  |  | ? | ? | 47 |
| Cho SB  [44] | retrosp.  IIABO n=17 |  |  |  |  |  |  |  |  |  | 14 | 3 |  |  |  |  |  |  |  |  |  |  |  |  |  |  |  |  |  |  |  | 2319  (1000-4500) | 2060 mL  (1200-8000) |  |  |  |  |  |  |  |  |  |  |  |  |  |  |  | 5 |
| retrosp.  control n=25 |  |  |  |  |  |  |  |  |  | 21 | 4 |  |  |  |  |  |  |  |  |  |  |  |  |  |  |  |  |  |  |  | 4435  (1500-10500) | 3840 mL  (1800-15200) |  |  |  |  |  |  |  |  |  |  |  |  |  |  |  | 11 |
| Bartal MF  [45] | two-center retrosp.  planned n=68 |  |  |  |  |  |  |  |  | 21 | 26 | 21 |  |  |  |  |  |  | 12 |  |  |  | n=24a |  |  |  |  |  |  |  | 34 FFP/ Platelets/ Cryo | 2000  (1500-3000) | 2  (0-4) | 34 FFP/ Platelets/ Cryo |  |  |  |  |  |  |  |  |  |  |  |  |  |  | 68 |
| two-center retrosp.  un-planned n=41 |  |  |  |  |  |  |  |  | 16 | 9 | 16 |  |  |  |  |  |  | 16 |  |  |  | n=7a |  |  |  |  |  |  |  | 29 FFP/ Platelets/ Cryo | 3000  (1500-4900) | 5  (2-7) | 29 FFP/ Platelets/ Cryo |  |  |  |  |  |  |  |  |  |  |  |  |  |  | 41 |
| Whittington JR  [46] | retrosp.  emer-gency n=5 |  |  |  |  |  |  |  |  |  |  |  |  |  |  |  |  |  |  |  |  |  |  |  |  |  |  |  |  |  |  | 5000  ±15250 | 8 ±28 |  |  |  |  |  |  |  |  |  |  |  |  |  |  |  | 5 |
| retrosp.  prophy-lactic n=11 |  |  |  |  |  |  |  |  |  |  |  |  |  |  |  |  |  |  |  |  |  |  |  |  |  |  |  |  |  |  | 2000  ±1000 | 1 ±15 |  |  |  |  |  |  |  |  |  |  |  |  |  |  |  | 11 |
| Stubbs MK  [47] | case series  n=5 | 5 |  |  |  |  |  |  |  |  |  | 5 |  |  |  |  |  |  | 5 |  |  |  |  | 909 (0-2500) |  |  |  |  |  |  | 3.4  (0-10) | 2940  (800-7500) | 2.2  (0-6) | 1.4  (0-4) | 0.2 (0-1) | 2000  (1600-2400) | 300 (0-1000) | pre: 10.8 (9.9-12)  post: 10.2 (9-11.4) |  |  |  |  |  |  |  |  |  |  |  |
| Mei Y  [48] | retrosp.  IAABO n=31 |  |  |  |  |  |  |  |  | 1 | 15 | 15 |  |  |  |  |  |  |  |  |  |  |  |  |  |  |  |  |  |  |  | 2000  (1500-2600) | 4  (2-8) | 400 mL  (0-800) |  |  |  |  |  |  |  |  |  |  |  |  |  |  | 9 direct  + ? |
| retrosp.  IIABO n=17 |  |  |  |  |  |  |  |  | 0 | 9 | 8 |  |  |  |  |  |  |  |  |  |  |  |  |  |  |  |  |  |  |  | 3000  (2100-3100) | 9.5 (6-12) | 850 mL  (600-1200) |  |  |  |  |  |  |  |  |  |  |  |  |  |  | 2 direct  + ? |
| retrosp.  control n=15 |  |  |  |  |  |  |  |  | 0 | 9 | 6 |  |  |  |  |  |  |  |  |  |  |  |  |  |  |  |  |  |  |  | 3000  (2200-4500) | 8 (6-12) | 700 mL  (400-1150) |  |  |  |  |  |  |  |  |  |  |  |  |  |  | 2 direct  + ? |
| Herbert K  [49] | case report | 1 |  |  |  |  |  |  |  |  |  | 1 | 1 | 1 |  |  |  |  |  | 1 |  |  |  | 5U | 1 |  |  |  |  |  |  | 4000 | 3 | 3 |  |  |  |  |  |  |  |  |  |  |  |  |  |  | 1 |
| Pinas-Carrillo A  [50] | retrosp.  n=50 | 4 |  | 46 |  | 4 |  | 38 | 8 | 28 PAS  2 inconclusive  10 neg.  10 n.n. | | |  |  |  |  |  |  |  |  |  |  |  |  |  |  |  |  |  |  |  | 2318  (400-7300) | 0: n=21a; 1-2: n=9a; 3-4: n=1a; >4 n=9a | 0: n=31a; 1-2: n=2a; >2: n=17a |  |  |  | post: 9.8 (8-12.4) |  |  |  |  |  |  |  |  |  | 50 | 0 |
| Bluth A  [51] | retrosp.  n=46 |  |  |  |  |  |  |  |  | 26 | 18 | 2 |  |  |  |  |  |  | 6 |  |  |  |  |  |  |  |  |  |  |  |  | 1600  (1100-2750) | 2  (0-4) |  |  |  |  | post: <4.9: n=8a; <6.2: n=24a; ≥6.2: n=12a [mmol/l] |  |  |  |  |  |  |  |  | 20 | 8 | 18 |
| Nieto-Calvache AJ  [52] | retrosp.  group A n=25 |  |  |  |  |  |  |  |  | 15 | 5 | 5 |  |  |  |  |  |  |  |  |  |  | n=11a | 210  (200-285) |  | n=8a |  |  |  |  | n=0a | 2000  (1500-2500) | 2 (0-3)  n=14a | n=5a | n=3a |  |  | pre: 11.7 (10.9-12.8)  post: 10.7 (9.8-12.4) |  |  |  |  |  |  |  |  |  | 4 | 21 |
| retrosp.  group B n=25 |  |  |  |  |  |  |  |  | 10 | 8 | 7 |  |  |  |  |  |  |  |  |  |  | n=4a | 160  (114-328) |  | n=15a |  |  |  |  | n=2a | 1800  (1471-2500) | 0 (0-3)  n=12a | n=1a | n=2a |  |  | pre: 11.4 (10.4-12.3)  post: 9.1 (8.3-9.8) |  |  |  |  |  |  |  |  |  | 9 | 16 |
| retrosp.  group C n=16 |  |  |  |  |  |  |  |  | 10 | 3 | 3 |  |  |  |  |  |  |  |  |  |  | n=2a | 807-1339 |  | n=10a |  |  |  |  | n=4a | 3630  (3200-5000) | 3 (1.5-6)  n=13a | n=4a | n=2a |  |  | pre: 11.75 (10.99-12.1)  post: 8.75 (8.1-10.8) |  |  |  |  |  |  |  |  |  | 1 | 15 |
| Liu J  [53] | retrosp.  PBOA-ARA  n=30 |  |  |  |  |  |  |  |  | 8 | 15 | 7 |  |  |  |  |  | Oxy 20U, trom 250𝜇g in myometr. |  |  |  |  |  |  |  |  |  |  |  |  |  | [-0.17±0.89] | 0 (0-4) | 0 mL (0-400) |  |  |  | red.: -0.22 ±0.93 |  |  |  |  |  |  |  |  |  |  | 0 |
| retrosp.  PBOA-BRA  n=27 |  |  |  |  |  |  |  |  | 8 | 13 | 6 |  |  |  |  |  |  |  |  |  |  |  |  |  |  |  |  |  |  |  | [0.19±1.06] | 0 (0-6) | 0 mL (0-400) |  |  |  | red.: +0.24 ±0.98 |  |  |  |  |  |  |  |  |  |  | 1 |
| Cali G  [54] | prosp.  BC  n=30 |  |  | 30 |  |  |  | 24 | 6 | 12 |  | 8 |  |  |  |  |  | carb | 0 |  |  |  |  |  |  |  |  |  |  |  |  | 846.67  ±280.06 | 0.47±0.86  blood product use |  |  |  |  |  |  |  |  |  |  |  |  |  |  |  |  |
| prosp.  CHa  n=23 |  |  | 23 |  |  |  | 8 | 15 | 10 |  | 13 |  |  |  |  |  |  | 0 |  |  |  |  |  |  |  |  |  |  |  |  | 1156.52  ±576.69 | 1.96±2.46  blood product use |  |  |  |  |  |  |  |  |  |  |  |  |  |  |  |  |
| Salim R  [55] | single-center RCT  inter-vention n=13 | 13 |  |  |  |  |  |  |  |  |  |  | 13 | 13 |  |  |  |  |  |  |  |  |  |  |  |  |  |  |  |  | 0.8 ±2.8 | 1600 ±994 | 5.2 ±6.2 | 2.8 ±5.4 | 0.5 ±1.7 |  |  | red.:  -2.2±1.4 |  | red.: -53 ±47  (<150: n=4a) | INR>1,2  n=6a |  |  |  |  |  |  |  | 6 |
| single center RCT  control n=14 | 14 |  |  |  |  |  |  |  |  |  |  | 14 | 14 |  |  |  |  |  |  |  |  |  |  |  |  |  |  |  |  | 0.7 ±2.7 | 1614 ±727 | 4.1 ±3.8 | 1.7 ±2.7 | 0 ±0 |  |  | red.:  3.6±1.9 |  | red.: -78 ±70  (<150: n=6a) | INR>1.2  n=3a |  |  |  |  |  |  |  | 7 |
| GA=general anesthesia; SpA=spinal anesthesia; EDA=epidural anesthesia; CVL=central venous line; ICU=intensive care unit; PACU=post-anesthesia crea unit; PCC=prothrombin complex concentrate; rVIIa=recombinant factor VIIa; XIII=factor XIII; RBC=red blood cell concentrate; FFP=fresh frozen plasma; PTT=partial thromboplastin tine; ATIII=antithrombin III; DIC=disseminated intravascular coagulation; retrosp.=retrospective; prosp.=prospective; observ.=observational; CSE=combined spinal-epidural anesthesia; Prop= Propofol; Thio=Thiopental; Eto=Etomidate; Ket=Ketamine; Svo=Sevoflurane; Iso=Isoflurane; Des=Desflurane; Fent=Fentanyl; Remi=Remifentanil; MO=Morphine; NO2=Nitrogen dioxide; Roc=Rocuronium; Succ=Succinylcholine; Cis=Cisatacurium; Panc=Pancuronium; Bup=Bupivacaine; hbBup=hyperbaric Bupivacain; Oxy=Oxytocin; Carb=Carbetocin; Prost=Prostaglandine; Trom=Tromathamine; Nitro=Nitroglycerine; Cryo=Cryoprecipitate; pre=pre-operative; intra=intra-operative; post=post-operative; POD=post-operative day; red.=reduction; prim=primary; sec=secondary; myometr.=myometrium; a= n=xx = number of patients receiving intervention (if average was indeterminate); b=preoperative -> interoperative -> postoperative; c=preoperative -> postoperative | | | | | | | | | | | | | | | | | | | | | | | | | | | | | | | | | | | | | | | | | | | | | | | | | |

**Literature**

1. Sentilhes L, Ambroselli C, Kayem G, Provansal M, Fernandez H, Perrotin F, et al. Maternal outcome after conservative treatment of placenta accreta. Obstet. Gynecol. 2010;115:526–34.

2. Frasca D. A Cesarean hysterectomy for invading placenta percreta: anesthetic safety considerations--a case report. AANA J. 2012;80:373–8.

3. Kamani AA, Gambling DR, Christilaw J, Flanagan ML. Anaesthetic management of patients with placenta accreta. Can. J. Anaesth. J. Can. Anesth. 1987;34:613–7.

4. Matsuzaki S, Yoshino K, Endo M, Tomimatsu T, Takiuchi T, Mimura K, et al. Successful anticoagulant therapy for disseminated intravascular coagulation during conservative management of placenta percreta: a case report and literature review. BMC Pregnancy Childbirth 2017;17:443.

5. Bourrellier L, Bensalem R, Bersot Y, Bertrand A, Duminil L, Malinovsky JM, et al. Disseminated intravascular coagulation syndrome two months after conservative management of placenta accreta. About two patients. Eur. J. Obstet. Gynecol. Reprod. Biol. 2017;215:266–7.

6. Desbriere R, Pascal A, Katsogiannou M, Mace P, Laplane C, Amar-Millet A, et al. Delayed disseminated intravascular coagulation revealed by spontaneous hematomas after conservative treatment of placenta percreta. Eur. J. Obstet. Gynecol. Reprod. Biol. 2018;226:77–8.

7. Weiniger CF, Elram T, Ginosar Y, Mankuta D, Weissman C, Ezra Y. Anaesthetic management of placenta accreta: use of a pre-operative high and low suspicion classification. Anaesthesia 2005;60:1079–84.

8. Schröder L, Pötzsch B, Rühl H, Gembruch U, Merz WM. Tranexamic Acid for Hyperfibrinolytic Hemorrhage During Conservative Management of Placenta Percreta. Obstet. Gynecol. 2015;126:1012–5.

9. Kume K, M Tsutsumi Y, Soga T, Sakai Y, Kambe N, Kawanishi R, et al. A case of placenta percreta with massive hemorrhage during cesarean section. J. Med. Investig. JMI 2014;61:208–12.

10. Bergakker SA. Case report: management of elective cesarean delivery in the presence of placenta previa and placenta accreta. AANA J. 2010;78:380–4.

11. Taylor NJ, Russell R. Anaesthesia for abnormally invasive placenta: a single-institution case series. Int. J. Obstet. Anesth. 2017;30:10–5.

12. Sivasankar C. Perioperative management of undiagnosed placenta percreta: case report and management strategies. Int. J. Womens Health 2012;4:451–4.

13. Khokhar RS, Baaj J, Khan MU, Dammas FA, Rashid N. Placenta accreta and anesthesia: A multidisciplinary approach. Saudi J. Anaesth. 2016;10:332–4.

14. Yamada T, Hirahata E, Ihara N, Nishimura D, Inoue K, Kato J, et al. Cesarean hysterectomy in a hybrid operating room for placenta percreta: a report of three cases. JA Clin. Rep. 2019;5:9.

15. Fratto VM, Conturie CL, Ballas J, Pettit KE, Stephenson ML, Truong YN, et al. Assessing the multidisciplinary team approaches to placenta accreta spectrum across five institutions within the University of California fetal Consortium (UCfC). J. Matern.-Fetal Neonatal Med. Off. J. Eur. Assoc. Perinat. Med. Fed. Asia Ocean. Perinat. Soc. Int. Soc. Perinat. Obstet. 2019;1–6.

16. Binici O, Büyükfırat E. Anesthesia for Cesarean Section in Parturients with Abnormal Placentation: A Retrospective Study. Cureus 2019;11:e5033.

17. Shamshirsaz AA, Fox KA, Erfani H, Clark SL, Hui SK, Shamshirsaz AA, et al. Coagulopathy in surgical management of placenta accreta spectrum. Eur. J. Obstet. Gynecol. Reprod. Biol. 2019;237:126–30.

18. Karacaer F, Biricik E, Ilgınel M, Tunay D, Sucu M, Ünlügenç H. Retrospective Analysis of Eighty-Nine Caesarean Section Cases with Abnormal Placental Invasion. Turk. J. Anaesthesiol. Reanim. 2019;47:112–9.

19. Quist-Nelson J, Crank A, Oliver EA, Kim CH, Richard S, George B, et al. The compliance with a patient-safety bundle for management of placenta accreta spectrum†. J. Matern.-Fetal Neonatal Med. Off. J. Eur. Assoc. Perinat. Med. Fed. Asia Ocean. Perinat. Soc. Int. Soc. Perinat. Obstet. 2019;1–7.

20. Atallah D, Abou Zeid H, Moubarak M, Moussa M, Nassif N, Jebara V. “You only live twice”: multidisciplinary management of catastrophic case in placenta Accreta Spectrum-a case report. BMC Pregnancy Childbirth 2020;20:135.

21. Biele C, Kaufner L, Schwickert A, Nonnenmacher A, von Weizsäcker K, Muallem MZ, et al. Conservative management of abnormally invasive placenta complicated by local hyperfibrinolysis and beginning disseminated intravascular coagulation. Arch. Gynecol. Obstet. 2021;303:61–8.

22. Ma Y, You Y, Jiang X, Lin X. Use of nitroglycerin for parallel transverse uterine cesarean section in patients with pernicious placenta previa and placenta accrete and predicted difficult airway: A case report and review of literature. Medicine (Baltimore) 2020;99:e18943.

23. Ito M, Oshita K, Tanaka K, Hara M, Hiraki T. Massive obstetric hemorrhage during cesarean section in a patient after conception by frozen-thawed embryo transfer: a case report. JA Clin. Rep. 2020;6:2.

24. Cojocaru L, Lankford A, Galey J, Bharadwaj S, Kodali BS, Kennedy K, et al. Surgical advances in the management of placenta accreta spectrum: establishing new expectations for operative blood loss. J. Matern.-Fetal Neonatal Med. Off. J. Eur. Assoc. Perinat. Med. Fed. Asia Ocean. Perinat. Soc. Int. Soc. Perinat. Obstet. 2020;1–10.

25. Urfalıoglu A, Öksüz G, Bilal B, Teksen S, Calışır F, Boran ÖF, et al. Retrospective Evaluation of Anesthetic Management in Cesarean Sections of Pregnant Women with Placental Anomaly. Anesthesiol. Res. Pract. 2020;2020:1358258.

26. Nieto AJ, Echavarría MP, Carvajal JA, Messa A, Burgos JM, Ordoñez C, et al. Placenta accreta: importance of a multidisciplinary approach in the Colombian hospital setting. J. Matern.-Fetal Neonatal Med. Off. J. Eur. Assoc. Perinat. Med. Fed. Asia Ocean. Perinat. Soc. Int. Soc. Perinat. Obstet. 2020;33:1321–9.

27. Zhu H, Wang S, Shi J, Yao L, Wang L, Chen H, et al. Prophylactic endovascular balloon occlusion of the aorta in cases of placenta accreta spectrum during caesarean section: points from the anaesthesiologist’s perspective. BMC Pregnancy Childbirth 2020;20:446.

28. Schwickert A, van Beekhuizen HJ, Bertholdt C, Fox KA, Kayem G, Morel O, et al. Association of peripartum management and high maternal blood loss at cesarean delivery for placenta accreta spectrum (PAS): A multinational database study. Acta Obstet. Gynecol. Scand. 2021;100 Suppl 1:29–40.

29. Bartels HC, Mulligan KM, Craven S, Rogers AC, Higgins S, O’Brien DJ, et al. Maternal morbidity in placenta accreta spectrum following introduction of a multi-disciplinary service compared to standard care: an Irish perspective. Ir. J. Med. Sci. 2021;

30. Khoiwal K, Gaurav A, Kapur D, Kumari O, Sharma P, Bhandari R, et al. Placenta percreta - a management dilemma: an institutional experience and review of the literature. J. Turk. Ger. Gynecol. Assoc. 2020;21:228–35.

31. Saito K, Mariya T, Fujibe Y, Saito M, Hirokawa N, Ishioka S, et al. Common iliac artery dissection as a complication of common iliac artery balloon occlusion for placenta percreta: A case report. J. Obstet. Gynaecol. Res. 2021;47:1172–7.

32. Frank Wolf M, Maymon S, Shnaider O, Singer-Jordan J, Maymon R, Bornstein J, et al. Two approaches for placenta accreta spectrum: B-lynch suture versus pelvic artery endovascular balloon. J. Matern.-Fetal Neonatal Med. Off. J. Eur. Assoc. Perinat. Med. Fed. Asia Ocean. Perinat. Soc. Int. Soc. Perinat. Obstet. 2020;33:2711–7.

33. Kim MJ, Kim IJ, Kim S, Park IY. Postpartum hemorrhage with uterine artery embolization: the risk of complications of uterine artery embolization. Minim. Invasive Ther. Allied Technol. MITAT Off. J. Soc. Minim. Invasive Ther. 2020;1–8.

34. Tokue H, Tokue A, Tsushima Y, Kameda T. Safety and Efficacy of Aortic Vs Internal Iliac Balloon Occlusion for Cesarean Delivery in Coexisting Placenta Accreta and Placenta Previa. Cardiovasc. Intervent. Radiol. 2020;43:1277–84.

35. Papillon-Smith J, Hobson S, Allen L, Kingdom J, Windrim R, Murji A. Prophylactic internal iliac artery ligation versus balloon occlusion for placenta accreta spectrum disorders: A retrospective cohort study. Int. J. Gynaecol. Obstet. Off. Organ Int. Fed. Gynaecol. Obstet. 2020;151:91–6.

36. Li P, Liu X, Li X, Wei X, Liao J. Clinical outcomes and anesthetic management of pregnancies with placenta previa and suspicion for placenta accreta undergoing intraoperative abdominal aortic balloon occlusion during cesarean section. BMC Anesthesiol. 2020;20:133.

37. Chen M, Liu X, You Y, Wang X, Li T, Luo H, et al. Internal Iliac Artery Balloon Occlusion for Placenta Previa and Suspected Placenta Accreta: A Randomized Controlled Trial. Obstet. Gynecol. 2020;135:1112–9.

38. Dai M, Jin G, Lin J, Zhang Y, Chen Y, Zhou Q, et al. Control of postpartum hemorrhage in women with placenta accreta spectrum using prophylactic balloon occlusion combined with Pituitrin intra-arterial infusion. Eur. Radiol. 2020;30:4524–33.

39. Yuan Q, Jin Y, Chen L, Ling L, Bai XM. Prophylactic uterine artery embolization during cesarean delivery for placenta previa complicated by placenta accreta. Int. J. Gynaecol. Obstet. Off. Organ Int. Fed. Gynaecol. Obstet. 2020;149:43–7.

40. Imtiaz R, Masood Z, Husain S, Husain S, Izhar R, Hussain S. A comparison of antenatally and intraoperatively diagnosed cases of placenta accreta spectrum. J. Turk. Ger. Gynecol. Assoc. 2020;21:84–9.

41. Peng W, Shen L, Wang S, Wang H. Retrospective analysis of 586 cases of placenta previa and accreta. J. Obstet. Gynaecol. J. Inst. Obstet. Gynaecol. 2020;40:609–13.

42. Zhou X, Sun X, Wang M, Huang L, Xiong W. The effectiveness of prophylactic internal iliac artery balloon occlusion in the treatment of patients with pernicious placenta previa coexisting with placenta accreta. J. Matern.-Fetal Neonatal Med. Off. J. Eur. Assoc. Perinat. Med. Fed. Asia Ocean. Perinat. Soc. Int. Soc. Perinat. Obstet. 2021;34:93–8.

43. Titapant V, Tongdee T, Pooliam J, Wataganara T. Retrospective analysis of 113 consecutive cases of placenta accreta spectrum from a single tertiary care center. J. Matern.-Fetal Neonatal Med. Off. J. Eur. Assoc. Perinat. Med. Fed. Asia Ocean. Perinat. Soc. Int. Soc. Perinat. Obstet. 2020;33:3324–31.

44. Cho SB, Hong SJ, Lee S, Won JH, Choi HC, Ha JY, et al. Preoperative Prophylactic Balloon-Assisted Occlusion of the Internal Iliac Arteries in the Management of Placenta Increta/Percreta. Med. Kaunas Lith. 2020;56.

45. Fishel Bartal M, Papanna R, Zacharias NM, Soriano-Calderon N, Limas M, Blackwell SC, et al. Planned versus Unplanned Delivery for Placenta Accreta Spectrum. Am. J. Perinatol. 2020;

46. Whittington JR, Pagan ME, Nevil BD, Kalkwarf KJ, Sharawi NE, Hughes DS, et al. Risk of vascular complications in prophylactic compared to emergent resuscitative endovascular balloon occlusion of the aorta (REBOA) in the management of placenta accreta spectrum. J. Matern.-Fetal Neonatal Med. Off. J. Eur. Assoc. Perinat. Med. Fed. Asia Ocean. Perinat. Soc. Int. Soc. Perinat. Obstet. 2020;1–4.

47. Stubbs MK, Wellbeloved MA, Vally JC. The management of patients with placenta percreta: A case series comparing the use of resuscitative endovascular balloon occlusion of the aorta with aortic cross clamp. Indian J. Anaesth. 2020;64:520–3.

48. Mei Y, Luo D, Wei S, Wang L, Liao X, Jing H, et al. Comparison of emergency cesarean hysterectomy with and without prophylactic placement of intravascular balloon catheters in patients with placenta accreta spectrum. J. Matern.-Fetal Neonatal Med. Off. J. Eur. Assoc. Perinat. Med. Fed. Asia Ocean. Perinat. Soc. Int. Soc. Perinat. Obstet. 2020;1–6.

49. Herbert K, Buchbinder L, Seshachellam V, Lee L. Resuscitative Endovascular Balloon Occlusion of the Aorta and Concomitant Tranexamic Acid for Cesarean Hysterectomy Complicated by Common Femoral Artery Thrombosis: A Case Report. Cureus 2020;12:e11197.

50. Pinas-Carrillo A, Bhide A, Moore J, Hartopp R, Belli AM, Arulkumaran S, et al. Outcomes of the first 50 patients with abnormally invasive placenta managed using the “Triple P Procedure” conservative surgical approach. Int. J. Gynaecol. Obstet. Off. Organ Int. Fed. Gynaecol. Obstet. 2020;148:65–71.

51. Bluth A, Schindelhauer A, Nitzsche K, Wimberger P, Birdir C. Placenta accreta spectrum disorders-experience of management in a German tertiary perinatal centre. Arch. Gynecol. Obstet. 2021;303:1451–60.

52. Nieto-Calvache AJ, López-Girón MC, Quintero-Santacruz M, Bryon AM, Burgos-Luna JM, Echavarría-David MP, et al. A systematic multidisciplinary initiative may reduce the need for blood products in patients with abnormally invasive placenta. J. Matern.-Fetal Neonatal Med. Off. J. Eur. Assoc. Perinat. Med. Fed. Asia Ocean. Perinat. Soc. Int. Soc. Perinat. Obstet. 2020;1–7.

53. Liu J, Xu J, Jiao D, Duan X, Han X. Comparison of the efficacy of prophylactic balloon occlusion of the abdominal aorta at or below the level of the renal artery in women with placenta accreta undergoing cesarean section. J. Matern.-Fetal Neonatal Med. Off. J. Eur. Assoc. Perinat. Med. Fed. Asia Ocean. Perinat. Soc. Int. Soc. Perinat. Obstet. 2019;1–8.

54. Cali G, Forlani F, Giambanco L, Amico ML, Vallone M, Puccio G, et al. Prophylactic use of intravascular balloon catheters in women with placenta accreta, increta and percreta. Eur. J. Obstet. Gynecol. Reprod. Biol. 2014;179:36–41.

55. Salim R, Chulski A, Romano S, Garmi G, Rudin M, Shalev E. Precesarean Prophylactic Balloon Catheters for Suspected Placenta Accreta: A Randomized Controlled Trial. Obstet. Gynecol. 2015;126:1022–8.
